# Supplementary material for: Factors Associated with Prenatal Smoking Cessation Interventions among Public Health Nurses in Japan
Source: Int J Environ Res Public Health. 2020 Aug 24;17(17):6135. doi: 10.3390/ijerph17176135 (PMC7503931; doi:10.3390/ijerph17176135)
Supplement: Supplementary file 1 [file ijerph-17-06135-s001.zip › Supplementary file 2.xlsx]

## Sheet: Item analysis
		Items		Always N（％）	Usually N（％）	Occasionally N（％）	Rarely N（％）	Almost never N（％）	Not at all N（％）	Mean ± SD	G-P analysis	Items correlation	Deleted items
	Ask	1	I confirm whether the expectant mother currently smokes	495（89.4）	56（10.1）	1（0.2）	1（0.2）	1（0.2）	0（0）	4.9 ± 0.38	0.471 ***	ー
		2	I confirm whether the expectant mother has smoked in the past	368（66.4）	89（16.1）	39（7.0）	31（5.6）	16（2.9）	11（2.0）	4.3 ± 1.20	2.399 ***	ー
		3	If the expectant mother smokes, I confirm the age she started smoking and how many cigarettes a day she smokes	246（44.4）	123（22.2）	94（17.0）	53（9.6）	26（4.7）	12（2.2）	3.9 ± 1.32	3.022 ***	ー
		4	I confirm whether any members of her household currently smoke	425（76.7）	82（14.8）	24（4.3）	17（3.1）	4（0.7）	2（0.4）	4.6 ± 0.82	1.500 ***	ー
		5	If any household member smokes, I confirm the location where the household member or members smoke	319（57.6）	122（22.0）	47（8.5）	31（5.6）	17（3.１）	18（3.2）	4.2 ± 1.29	2.681 ***	ー
	Advise	If the expectant mother and household members are nonsmokers:
		6	I explain the harmful effects of smoking and secondhand smoke so that the expectant mother and household members continue not to smoke.	207（37.4）	130（23.5）	81（14.6）	77（13.9）	34（6.1）	25（4.5）	3.6 ± 1.48	3.594 ***	ー
		If the expectant mother is a former smoker who has quit smoking:
		7	I compliment the expectant mother for currently abstaining from smoking and confirm her intention to continue to abstain	258（46.6）	171（30.9）	69（12.5）	36（6.5）	12（2.2）	8（1.4）	4.1 ± 1.13	2.514 ***	ー
		If the expectant mother is a smoker:
		8	I explain the harmful effects of smoking on the health of the expectant mother and her unborn baby.	345（62.3）	164（29.6）	38（6.9）	3（0.5）	2（0.4）	2（0.4）	4.5 ± 0.73	1.420 ***	ー
		9	I explain the benefits of quitting smoking and encourage the expectant mother to quit smoking.	281（50.7）	169（30.5）	73（13.2）	27（4.9）	4（0.7）	0（0）	4.3 ± 0.91	2.007 ***	ー
		10	I explain the harmful effects of the toxic substances contained in tobacco (nicotine, tar, carbon monoxide, etc.).	181（32.7）	151（27.3）	134（24.2）	66（11.9）	15（2.7）	7（1.3）	3.7 ± 1.19	2.848 ***	ー
		11	I explain the expectant mother's new role and responsibilities as a mother.	69（12.5）	139（25.1）	162（29.2）	129（23.3）	38（6.9）	17（3.1）	3.0 ± 1.24	3.022 ***	ー
		12	I explain that medical insurance can be used for smoking cessation treatments.	76（13.7）	105（19.0）	124（22.4）	144（26.0）	51（9.2）	54（9.7）	2.7 ± 1.47	3.703 ***	＋	Deleted
		13	I explain that smoking cessation treatment increases the success rate of quitting smoking.	65（11.7）	93（16.8）	127（22.9）	153（27.6）	59（10.6）	57（10.3）	2.6 ± 1.45	3.725 ***	＋
		14	I use interview techniques such as active listening, acceptance, empathy, and motivational interviewing to encourage the expectant mother to quit smoking.	73（13.2）	136（24.5）	164（29.6）	111（20.0）	47（8.5）	23（4.2）	3.0 ± 1.30	3.203 ***	ー
		15	I encourage the expectant mother to quit smoking based on her personal traits (personality, medical history, reasons for smoking, etc.).	121（21.8）	184（33.2）	158（28.5）	61（11.0）	22（4.0）	8（1.4）	3.5 ± 1.15	2.812 ***	ー
		16	I use anti-smoking materials like pamphlets, charts, and photos to encourage the expectant mother to quit smoking.	115（20.8）	106（19.1）	108（19.5）	114（20.6）	56（10.1）	55（9.9）	2.9 ± 1.59	4.036 ***	ー
		If the expectant mother lives with a former smoker who has quit smoking:
		17	I compliment household members on quitting smoking and get the expectant mother to ask them to keep it up.	166（30.0）	171（30.9）	106（19.1）	52（9.4）	37（6.7）	22（4.0）	3.6 ± 1.38	3.391 ***	ー
		If the expectant mother lives with a smoker:
		18	I explain the harmful effects that secondhand smoke does to the expectant mother and her unborn baby.	253（45.7）	174（31.4）	92（16.6）	25（4.5）	5（0.9）	5（0.9）	4.1 ± 1.01	2.283 ***	＋
		19	I explain the benefits of household members abstaining from smoking and get the expectant mother to encourage them to quit smoking._x000D_	180（32.5）	181（32.7）	117（21.1）	53（9.6）	14（2.5）	9（1.6）	3.8 ± 1.17	2.783 ***	＋	Deleted
		20	I explain methods by which the expectant mother can avoid secondhand smoke.	199（35.9）	160（28.9）	126（22.7）	50（9.0）	13（2.3）	6（1.1）	3.8 ± 1.14	2.681 ***	ー
	Assess	If the expectant mother is a smoker:
		21	I confirm the expectant mother's intention to quit smoking in each interview	151（27.3）	146（26.4）	129（23.3）	69（12.5）	31（5.6）	28（5.1）	3.4 ± 1.41	3.558 ***	ー
		22	I confirm the expectant mother's stages of behavioral change toward quitting smoking in each interview	64（11.6）	89（16.1）	137（24.7）	140（25.3）	69（12.5）	55（9.9）	2.6 ± 1.45	3.761 ***	ー
		23	I assess her nicotine dependency level in each interview	10（1.8）	14（2.5）	35（6.3）	116（20.9）	144（26.0）	235（42.4）	1.1 ± 1.18	2.674 ***	ー
		24	I confirm that the expectant mother’s current level of confidence regarding quitting smoking is not zero (I check whether her level of confidence is increasing from the second interview onward)	21（3.8）	43（7.8）	77（13.9）	121（21.8）	129（23.3）	163（29.4）	1.6 ± 1.43	3.616 ***	ー
	Assist	If the expectant mother intends to quit smoking:
		25	I compliment the expectant mother for her intention to quit and provide appropriate support for her concerns.	194（35.0）	189（34.1）	121（21.8）	27（4.9）	15（2.7）	8（1.4）	3.9 ± 1.11	2.587 ***	ー
		26	I explain that smoking cessation treatment is “reliable” and “not very expensive”.	62（11.2）	103（18.6）	139（25.1）	133（24.0）	73（13.2）	44（7.9）	2.7 ± 1.42	3.616 ***	＋	Deleted
		27	I provide information on smoking cessation outpatient services and smoking cessation clinics that are covered by medical insurance.	65（11.7）	97（17.5）	123（22.2）	125（22.6）	73（13.2）	71（12.8）	2.5 ± 1.53	3.986 ***	＋
		28	I recommend the use of online easy-to-use smoking cessation support services and programs.	12（2.2）	23（4.2）	65（11.7）	138（24.9）	134（24.2）	182（32.9）	1.4 ± 1.28	3.065 ***	ー
		29	I recommend the expectant mother to ask for support from her family, friends, co-workers, and other acquaintances.	47（8.5）	113（20.4）	152（27.4）	104（18.8）	84（15.2）	54（9.7）	2.6 ± 1.43	3.732 ***	＋
		30	I provide some methods on how to avoid situations where she might be tempted to smoke (staying away from smoking areas, remove all ashtrays, etc.)._x000D_	74（13.4）	119（21.5）	163（29.4）	94（17.0）	62（11.2）	42（7.6）	2.9 ± 1.43	3.594 ***	＋	Deleted
		31	I provide some methods on how to deal with withdrawal symptoms after quitting smoking (irritability, headaches, sleeplessness, etc.)._x000D_	47（8.5）	117（21.1）	150（27.1）	106（19.1）	79（14.3）	55（9.9）	2.6 ± 1.43	3.710 ***	＋
	Arrange	If you provide ongoing smoking cessation support (during classroom sessions, by phone, during home visits, etc.):
		32	I confirm the smoking abstinence status of the expectant mother and her household members	148（26.7）	139（25.1）	121（21.8）	54（9.7）	52（9.4）	40（7.2）	3.3 ± 1.54	3.957 ***	＋
		33	I ask the expectant mother how her smoking cessation program and efforts to quit smoking have been going.	110（19.9）	141（25.5）	133（24.0）	66（11.9）	58（10.5）	46（8.3）	3.1 ± 1.53	3.884 ***	＋	Deleted
		34	I compliment the expectant mother and / or her household members for continuing to abstain from smoking and explain the importance of guarding against starting to smoke again	98（17.7）	154（27.8）	119（21.5）	74（13.4）	66（11.9）	43（7.8）	3.0 ± 1.52	3.812 ***	＋
		35	If the expectant mother has relapsed, I provide advice to guide her toward quitting again.	99（17.9）	138（24.9）	137（24.7）	69（12.5）	66（11.9）	45（8.1）	3.0 ± 1.51	3.848 ***	＋
		36	If the expectant mother is still smoking, I communicate that she can start smoking cessation treatment at any time.	73（13.2）	115（20.8）	117（21.1）	92（16.6）	92（16.6）	65（11.7）	2.6 ± 1.58	4.000 ***	＋	Deleted
		***：p < 0.001
