# Supplementary figures and images for: Factors Associated with Prenatal Smoking Cessation Interventions among Public Health Nurses in Japan
Source: MDPI journal article supplement (doi:10.3390/ijerph17176135), 2020-08-24

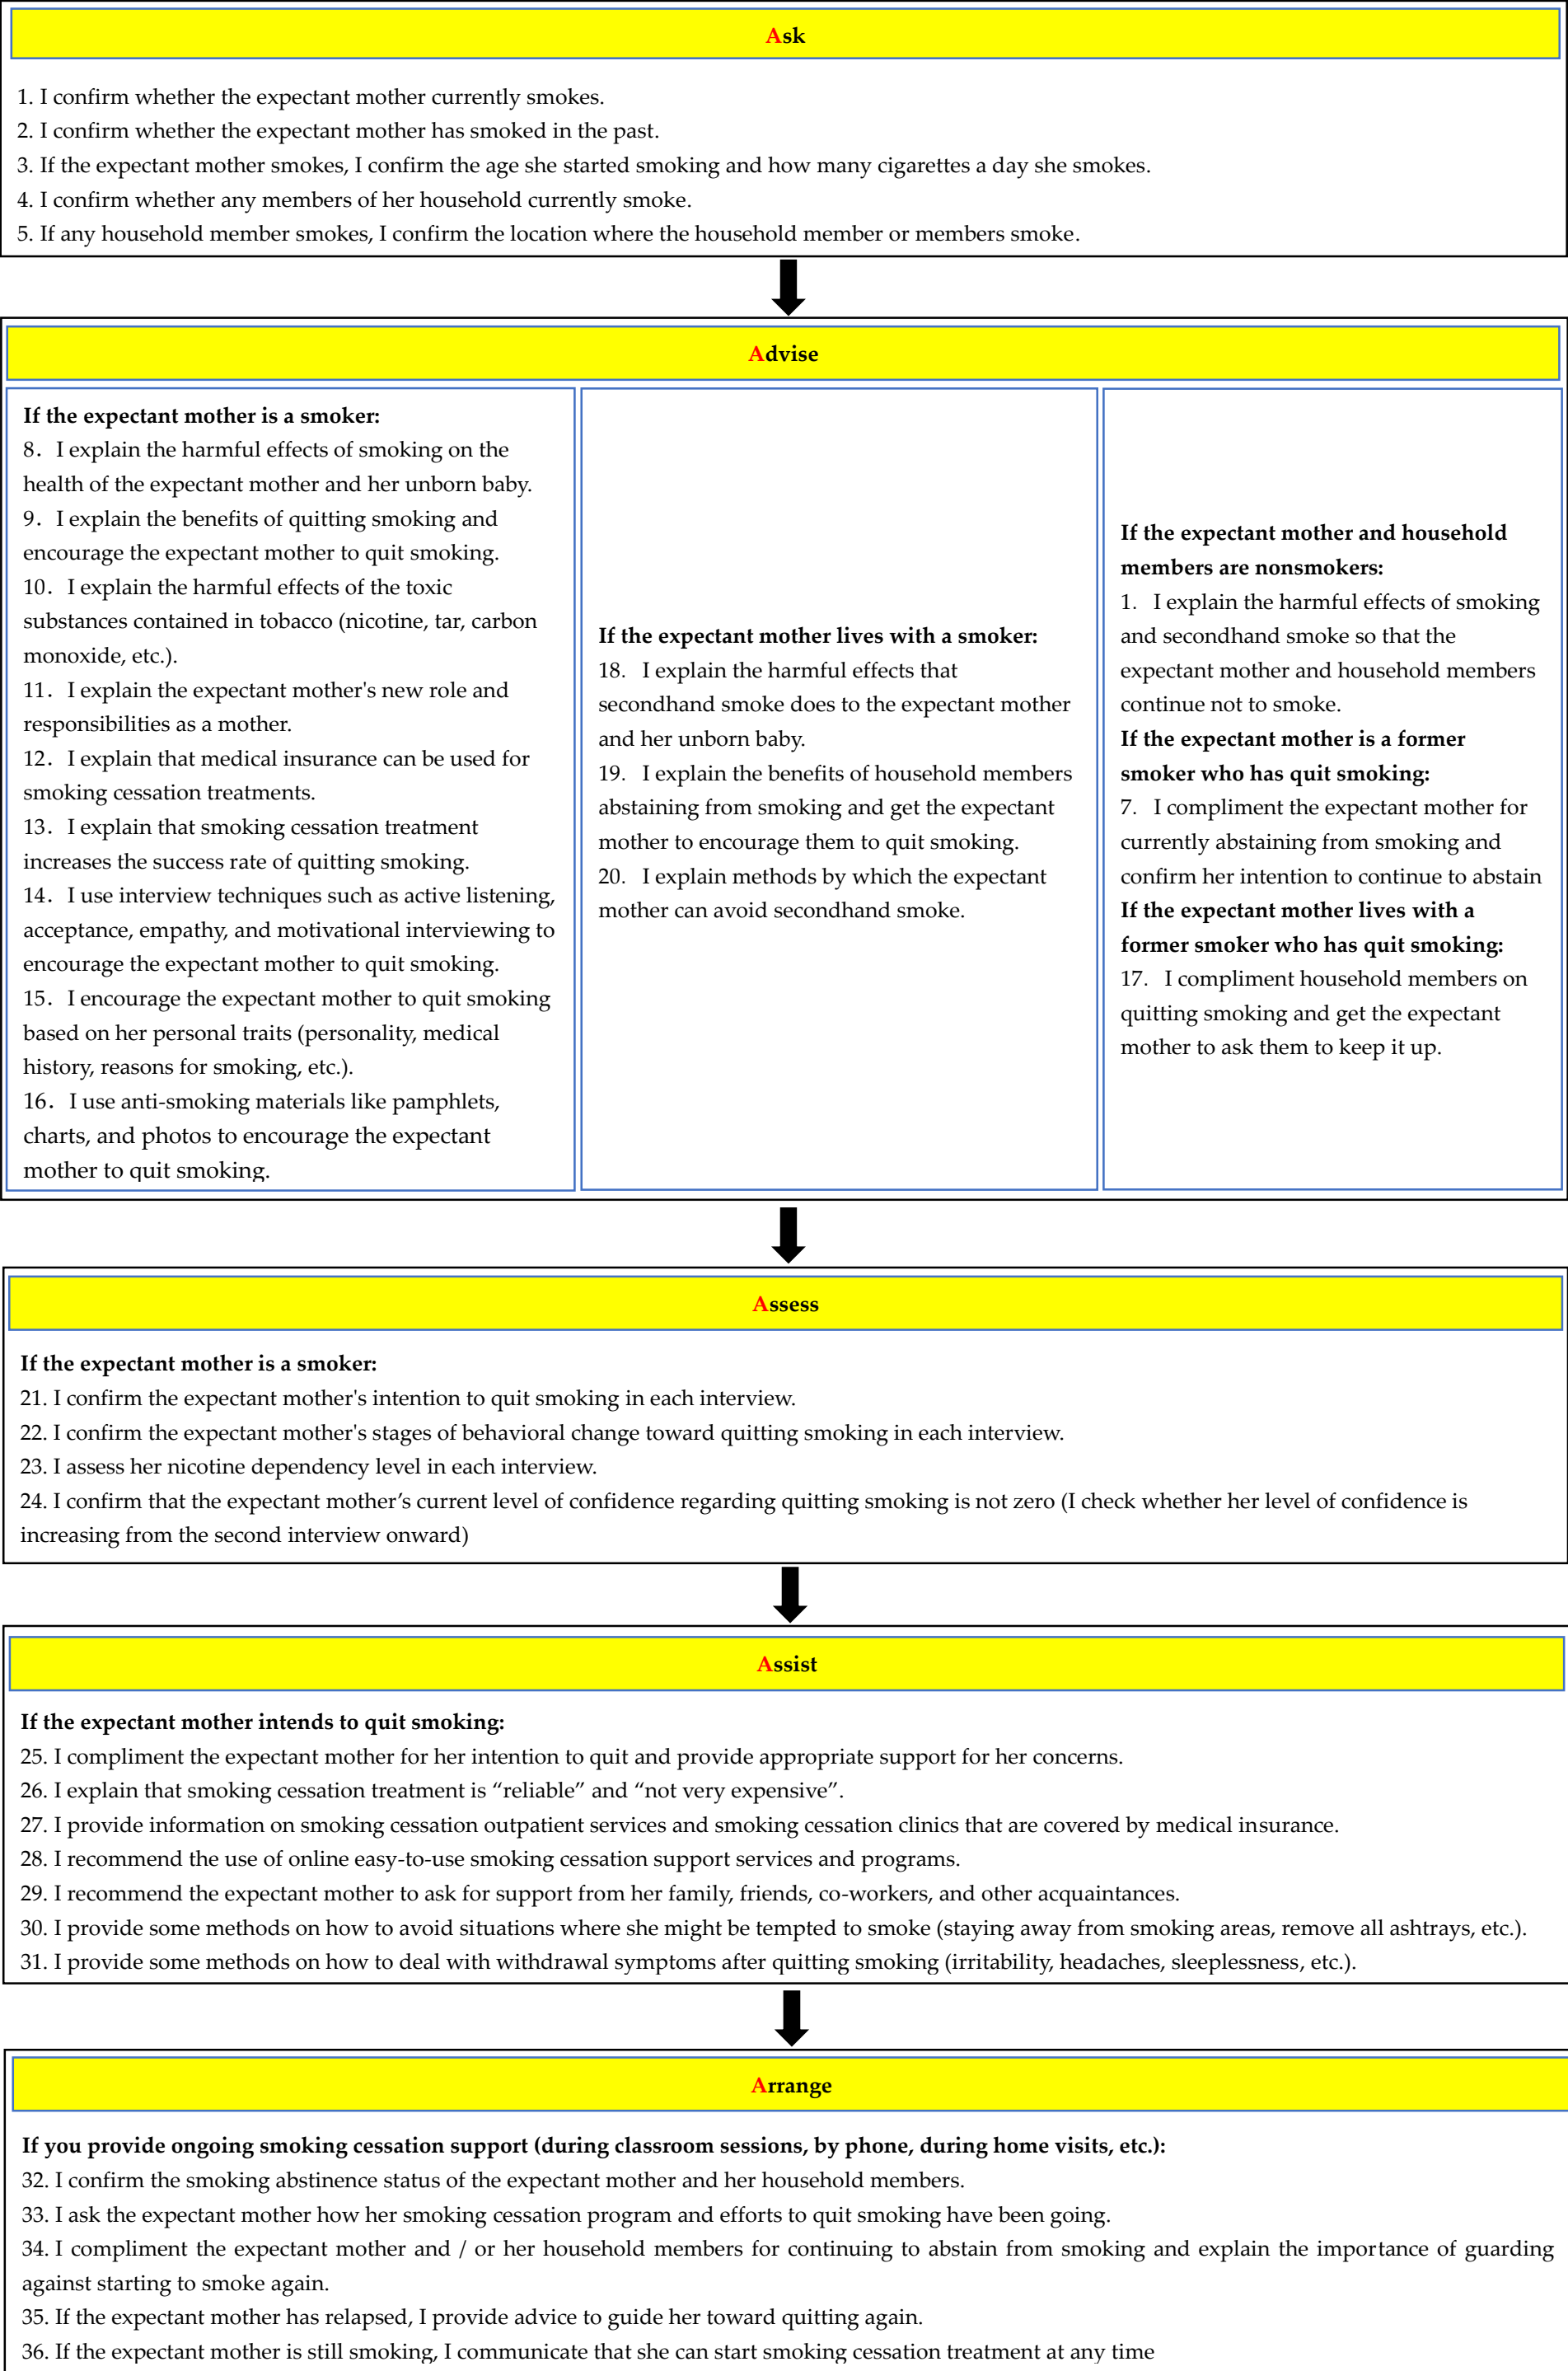

Figure 1. prenatal smoking cessation intervention draft scale.

Supplement: s1 [file s1]
